# Supplementary material
Source: PubMed Central journal article supplement (PMC3699879)
Supplement: NIHMS467525-supplement-Supplement_Data.pdf [file NIHMS467525-supplement-Supplement_Data.pdf]

**Figure S1**

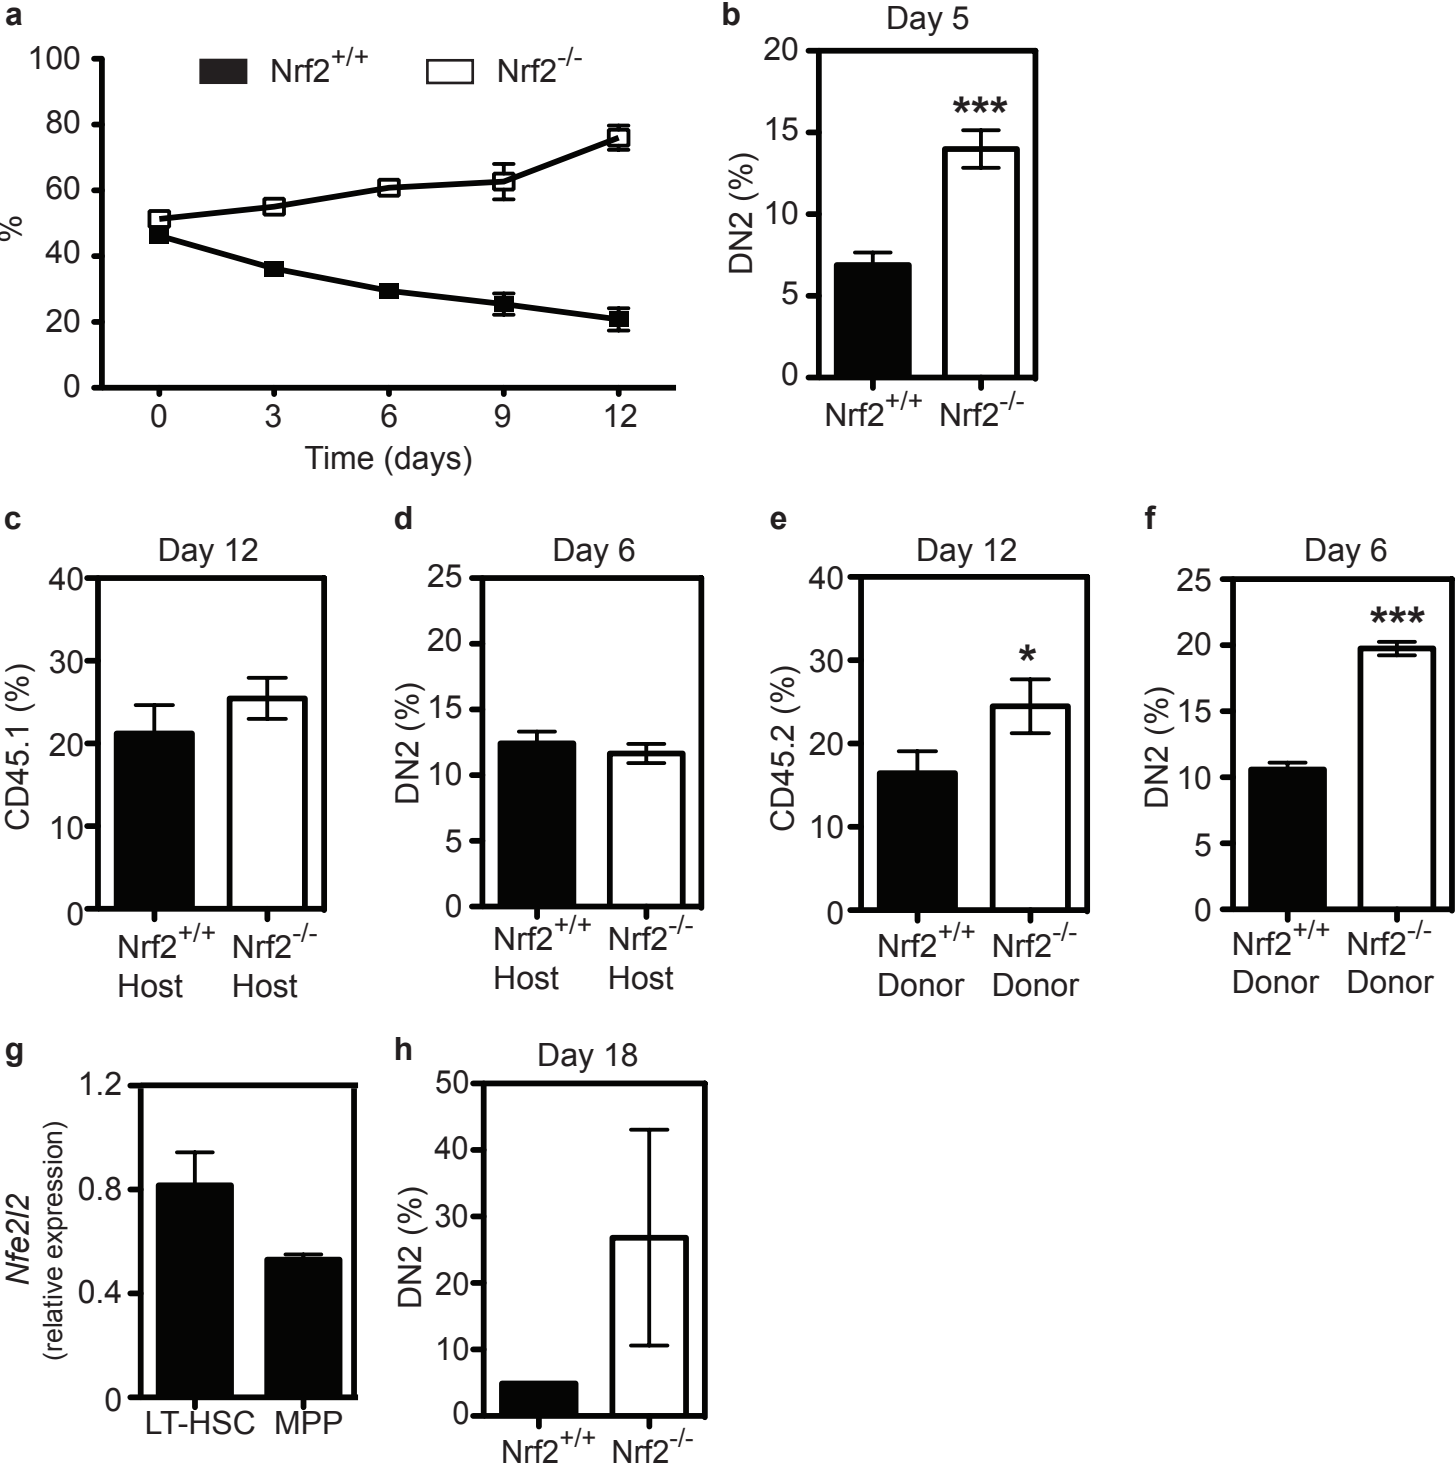

### **Figure S1. Nrf2 regulates HSPC Proliferation and Differentiation Intrinsically**

- (a) (Corresponding to Fig. 2a) Relative contribution of WT (CD45.1) and *Nrf2*<sup>-/-</sup> (CD45.2) sorted BM LSKs co-cultured with OP9-DL1 stromal cells over time. WT:*Nrf2*<sup>-/-</sup> = 1:1 on day 0. Data represent the mean  $\pm$  SEM, n = 7 independent observations over 4 experiments.
- (b) (Corresponding to Fig. 2b) Percentage of LSKs differentiating into DN2 stage on day 5 of OP9-DL1 co-culture. Data represent the mean  $\pm$  SEM, n = 7 independent observations over 5 experiments.
- (c) (Corresponding to Fig. 2d) CD45.1<sup>+</sup> WT LSKs were preconditioned in WT or *Nrf2*<sup>-/-</sup> BM niche *in vivo* then co-cultured with untransplanted CD45.2<sup>+</sup> WT LSKs at a 1:1 ratio on day 0 with OP9-DL1 stromal cells. Percentage of distribution from preconditioned WT LSKs determined at day 12 in culture. Data represent the mean  $\pm$  SEM, n = 5 observations per strain over 2 independent transplant experiments.
- (d) (Corresponding to Fig. 2e) Percentage of CD45.1<sup>+</sup> preconditioned WT LSKs differentiating into DN2 stage on day 6 of OP9-DL1 co-culture. Data represent the mean  $\pm$  SEM, n = 10 observations from WT and 8 from *Nrf2*<sup>-/-</sup> hosts over 2 independent transplant experiments.
- (e) (Corresponding to Fig. 2f) CD45.2<sup>+</sup> WT or *Nrf2*<sup>-/-</sup> LSKs were preconditioned in CD45.1<sup>+</sup> WT BM niche *in vivo* then co-cultured with untransplanted CD45.1<sup>+</sup> WT LSK at 1:1 ratio on day 0 of OP9-DL1 co-culture system. Percentage of distribution from preconditioned LSKs determined at day 12 of culture. Data represent the mean  $\pm$  SEM, n = 10 observations from WT and 8 from *Nrf2*<sup>-/-</sup> donors over 2 independent transplant experiments.
- (f) (Corresponding to Fig. 2g) Percentage of preconditioned CD45.2<sup>+</sup> WT or *Nrf2*<sup>-/-</sup> LSKs differentiating into DN2 stage at day 6 of OP9-DL1 co-culture. Data represent the mean  $\pm$  SEM, n = 9 observations from WT and 8 from *Nrf2*<sup>-/-</sup> donors over 2 independent transplant experiments.
- (g) Expression of *Nfe2l2* mRNA transcripts in sorted WT LT-HSC and MPP, presented relative to *Actb* expression. Data represent the mean  $\pm$  SEM, n = 3 independent experiments.
- (h) (Corresponding to Fig. 2i) Percentage of LT-HSCs differentiating into DN2 stage at day 18 of OP9-DL1 co-culture. Data represent the mean  $\pm$  SEM, n = 2 independent observations from WT and 3 from *Nrf2*<sup>-/-</sup> animals over 2 experiments.

Figure S2

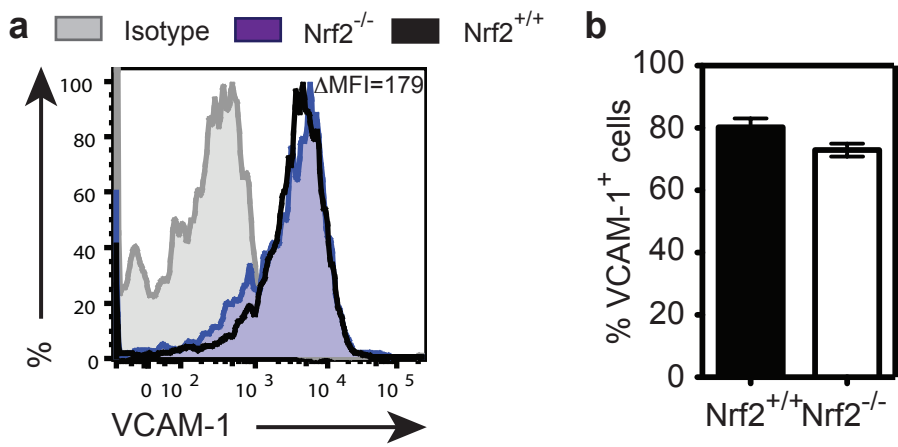

Figure S3

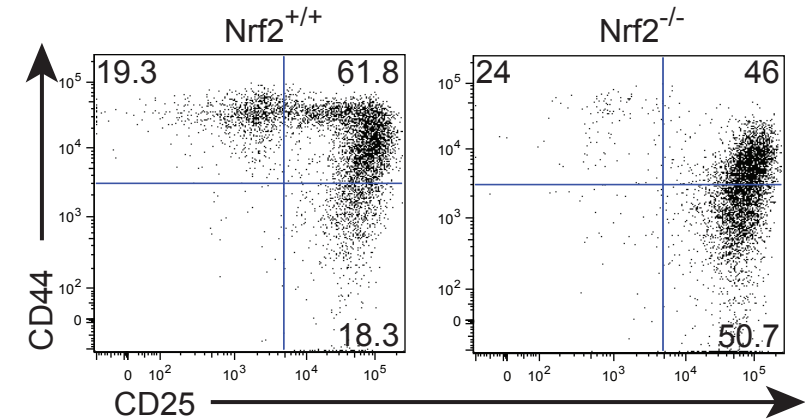

**Figure S2. VCAM-1 expression in *Nrf2*<sup>-/-</sup> HSPCs**

(a) Representative flow cytometric analysis and (b) bar graphs showing the proportion of sorted WT and *Nrf2*<sup>-/-</sup> BM LSK cells expressing VCAM-1.  $\Delta$  MFI (Mean fluorescence intensity) = (MFI of WT LSKs) - (MFI of *Nrf2*<sup>-/-</sup> LSKs). Data represent the mean  $\pm$  SEM, n = 5 animals per strain.

**Figure S3. Differentiation kinetics of *Nrf2*<sup>-/-</sup> HSPCs transduced with GFP control vector**

Representative flow cytometric analysis showing *Nrf2*<sup>-/-</sup> LSKs transduced with empty GFP control vector differentiated more rapidly into precursor T cells compared to transduced WT LSKs on day 11 of OP9-DL1 culture, n = 3 independent experiments.
